# Supplementary material
Source: PubMed Central journal article supplement (PMC3093487)
Supplement: 1104423108_pnas.201104423SI.pdf [file 1104423108_pnas.201104423SI.pdf]

# Supporting Information

Okazaki et al. 10.1073/pnas.1104423108

## SI Materials and Methods

**Expression Vectors and Cell Lines.** Mouse activation-induced cytidine deaminase (mAID) cDNA was cloned in-frame to the 5' end of EGFP-FLAG-HA sequence in pBluescript by a three-fragment ligation, and the resulting cDNA cassette encoding mAID-EGFP-FLAG-HA (mAID-GF) was excised and cloned into a retroviral vector pFB-ires-Puro (pFBP). Expression vectors of human AID (hAID) and AID mutants of human and mouse origins were generated by replacing the mAID fragment in pFBP-mAID-GF with the corresponding AID cDNAs. Retroviruses were produced by transient transfection of each pFBP vector into Plat-E cells using FuGENE 6 transfection reagent (Roche) and used to infect CH12F3-2 cells. Infected cells were selected with puromycin.

**Immunopurification and Mass Spectrometry.** Cytosolic extracts were prepared as described (1). Briefly, cells were washed once and resuspended in 1 mL/10<sup>8</sup> cells of hypotonic buffer [10 mM Hepes (pH 7.9), 1.5 mM MgCl<sub>2</sub>, 10 mM NaCl, Complete Protease Inhibitor Mixture (Roche)] and incubated on ice for 30 min. Cells were then disrupted by Dounce homogenization (50 strokes with a tight pestle) and centrifuged at 800 × g for 15 min at 4 °C. Supernatants were mixed with 0.11 volume of 10× cytosolic extraction buffer [0.3 M Hepes (pH 7.9), 30 mM MgCl<sub>2</sub>, and 1.4 M NaCl] and ultracentrifuged at 100,000 × g for 1 h at 4 °C. Resulting supernatants were supplemented with 10% glycerol and used as cytosolic extracts. Cytosolic extracts were precleared with mouse IgG-agarose (Sigma) for 30 min at 4 °C, then incubated with anti-FLAG M2-agarose (Sigma) for 2 h at 4 °C. After extensive washing with immunoprecipitation (IP) buffer [20 mM Hepes (pH 7.9), 1.5 mM MgCl<sub>2</sub>, 150 mM NaCl, 0.2 mM EDTA, 10% glycerol, Complete Protease Inhibitor Mixture (Roche)], coimmunoprecipitated proteins were eluted twice with 100 µg/mL

of 3× FLAG peptides in IP buffer. The eluates were separated on 6–9% SDS/PAGE gels and visualized with MS-compatible silver staining. Each band on gels was excised with a scalpel and subjected to MS as described previously (2). Briefly, proteins were in-gel digested with trypsin, and molecular-mass analysis of tryptic peptides was performed by MALDI-TOF/MS with an Ultraflex MALDI-TOF/TOF system (Bruker Daltonics). Mass spectra were subjected to peptide mass fingerprinting using the Mascot (Matrix Science) search engine against the NCBI database.

**IP and Western Blotting.** IP with anti-FLAG antibody was performed as described above, except that coimmunoprecipitated proteins were eluted by boiling in Laemmli buffer. For IP with anti-Spt6 antibody, cytosolic extracts were first precleared with Protein G-Sepharose pretreated with 0.1% BSA in IP buffer for 30 min at 4 °C, then incubated with anti-Spt6 mAb 2-1 (kindly provided by Dr. Handa, Tokyo Institute of Technology, Tokyo, Japan) for 1 h at 4 °C, and the immune complexes were captured for 1 h at 4 °C by Protein G-Sepharose pretreated as above. Coimmunoprecipitated proteins were eluted by boiling in Laemmli buffer. Eluted proteins were separated by SDS/PAGE, transferred to PVDF membranes, and probed with the following antibodies: an anti-Spt6 polyclonal antibody S2-B generated in our laboratory, anti-FLAG M2 antibody (Sigma), anti-Nucleolin polyclonal antibody (Novus Biologicals), anti-eEF1α monoclonal antibody (Upstate), and anti-KAP1 polyclonal antibody (Abcam). Signal was visualized using ECL Plus Western Blotting Detection Reagents (GE Healthcare) and detected with LAS4000 (Fujifilm). To analyze the effect of DNase I and RNase A treatment, cytosolic extracts were incubated at room temperature for 10 min either with RNase A (130 µg/mL) or with DNase I (4,000 U/mL) and subjected to IP.

1. Dignam JD, et al. (1983) Accurate transcription initiation by RNA polymerase II in a soluble extract from isolated mammalian nuclei. *Nucleic Acids Res* 11:1475–1489.

2. Takamatsu H, et al. (2009) Anti-moesin antibodies in the serum of patients with aplastic anemia stimulate peripheral blood mononuclear cells to secrete TNF-α and IFN-γ. *J Immunol* 182:703–710.

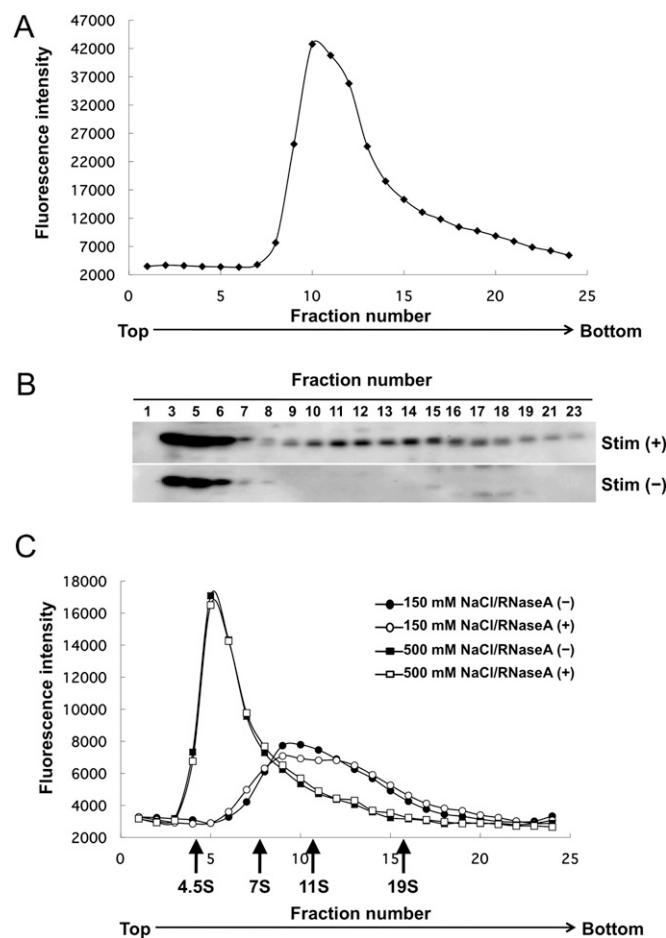

**Fig. S1.** (A) Glycerol gradient sedimentation analysis of AID-GF protein in CH12F3-2A cells. Cytoplasmic extracts of CH12F3-2A cells expressing AID-GF (GFP-FLAG) were fractionated by sedimentation in 10–50% (vol/vol) glycerol gradient at 284,400  $\times g$  for 17 h. The presence of AID-GF was monitored by GFP fluorescence. (B) Glycerol gradient sedimentation analysis of the endogenous AID protein in CH12F3-2A cells. Cytoplasmic extracts of unstimulated and stimulated CH12F3-2A cells were fractionated by sedimentation in 10–50% (vol/vol) glycerol gradient at 284,400  $\times g$  for 17 h. The presence of AID protein was monitored by Western blotting using anti-AID antibody (KKM-1). Strong signals observed in fractions 3–7 seemed to be nonspecific because they were also observed in unstimulated cells. (C) Distribution of AID-GF protein was analyzed by sedimentation in 10–50% (vol/vol) glycerol gradient at 284,400  $\times g$  for 17 h in the presence of either 150 mM NaCl or 500 mM NaCl in both cytosolic extracts and glycerol gradient. Cytosolic extracts were treated with RNase A before sedimentation. The positions of marker proteins are shown: ovalbumin (4.5S),  $\gamma$ -globulin (7S), catalase (11S), and thyroglobulin (19S).

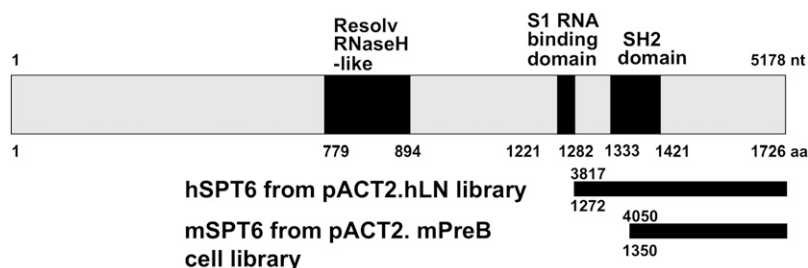

**Fig. S2.** SPT6 fragments isolated from yeast two-hybrid screening. pACT2 human lymph node cDNA library (Clontech) and pACT2 mouse pre-B-cell cDNA library (gift from Dr. Watanabe, Kyushu University, Fukuoka, Japan) were screened with pGBKT7-hAID and pGBKT7-mAID as bait, respectively. The C-terminal fragments of hSPT6 (3817–5178 nt) and mSPT6 (4050–5178 nt), which contain Src homology 2 domain, were isolated from the human and mouse libraries, respectively.

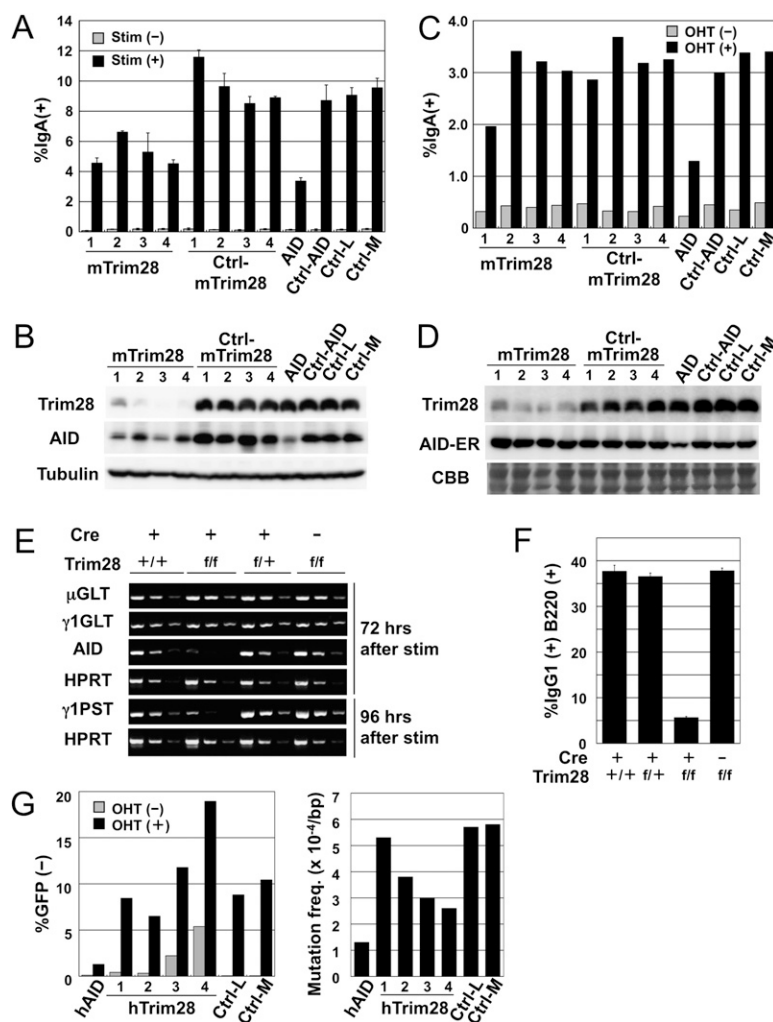

**Fig. S3.** (A) Trim28 knockdown severely reduced class switch recombination efficiency. CH12F3-2 cells ( $1.5 \times 10^6$ ) were introduced with 1.5  $\mu$ g of siRNAs against mTrim28, scrambled siRNA for them, an siRNA against mAID, a scrambled siRNA for it, or negative control siRNAs with a low (36%) and medium (48%) GC contents (Ctrl-L and Ctrl-M, respectively). The GC contents of oligos mTrim28-1, -2, -3, and -4 are medium (45–55%), and that of oligo AID is low (35–45%). Twenty-four hours after siRNA introduction, cells were stimulated with CD40L, IL-4, and TGF- $\beta$  for 24 h. The percentages of IgA<sup>+</sup> cells in the live population are indicated. Mean  $\pm$  SD values were obtained from triplicate experiments. (B) siRNAs against Trim28 efficiently reduced the amount of Trim28 protein but also reduced the amount of AID protein. (C) CH12F3-2 cells expressing mAID-ER ( $1.5 \times 10^6$ ) were introduced with 1.5  $\mu$ g of siRNAs against mTrim28, scrambled siRNA for them, an siRNA against mAID, a scrambled siRNA for it, or negative control siRNAs with low (36%) and medium (48%) GC contents (Ctrl-L and Ctrl-M, respectively). Twenty-four hours after siRNA introduction, cells were stimulated with OHT and TGF- $\beta$  for 24 h. Percentages of IgA<sup>+</sup> cells in the live population are indicated. (D) siRNAs against Trim28 efficiently reduced the amount of Trim28 protein but did not affect the amount of AID-ER protein. (E and F) Splenocytes from Trim28<sup>fl/fl</sup>  $\times$  mb1-hCre and control mice were stimulated with LPS and IL-4 *in vitro* for 3 or 4 d. The amounts of  $\mu$ GLT,  $\gamma$ 1GLT, AID,  $\gamma$ 1PST, and HPRT were analyzed by semiquantitative PCR using a threefold serial dilution series (E). Percentages of IgG1<sup>+</sup> cells are indicated (F). Mean  $\pm$  SD values were obtained from triplicate experiments. Data are representative of two mice for each genotype. Note that splenocytes from Trim28<sup>fl/fl</sup>  $\times$  mb1-hCre mice formed blasts, as well as those from control mice upon stimulation with LPS and IL-4, whereas the percentage and absolute number of B220<sup>+</sup> B cells, IgA<sup>+</sup> B cells, PNA<sup>hi</sup> B cells in mesenteric lymph nodes, and Peyer's patches from Trim28<sup>fl/fl</sup>  $\times$  mb1-hCre mice were reduced to approximately 10–25% of those from control mice. (G) Trim28 knockdown reduced SHM efficiency in the artificial substrate independently of AID function, presumably by reducing the transcription of the substrate. BL2 cells expressing JP8Bdel-ER and the artificial SHM assay substrate ( $1.5 \times 10^6$ ) were introduced with 3.0  $\mu$ g of siRNAs against hTRIM28, siRNAs against hAID, or negative control siRNAs with low (36%) and medium (48%) GC contents (Ctrl-L and Ctrl-M, respectively). The GC contents of oligos mTrim28-1, -2, -3, -4, and AID are medium (45–55%). Twenty-four hours after siRNA introduction, cells were stimulated with OHT for 24 h and incubated for an additional 48 h in the absence of OHT. Percentages of GFP<sup>+</sup> cells and mutation frequencies in the GFP sequence are shown. Data are representative of three independent experiments.
